# Supplementary material
Source: publisher figshare collection journal article supplement (https://diabetesjournals.figshare.com/articles/dataset/_/13225043)
Supplement: Supplementary file 1 [file 1]

SDRNT1BIO investigators:

John Chalmers, Andrew Collier, Colin Fischbacher, Donald Pearson, James Walker, Fiona Green, Robert Lindsay, John McKnight, Sandra MacRury, Colin Palmer, Alan Patrick, Sam Philip, John Petrie and Sandeep Thekkepat
